# Supplementary material
Source: publisher site journal article supplement (https://www.dovepress.com/article/535054)
Supplement: Supplementary file 1 [file 535054_Supplementary%20material_revised_1.doc]

**Supplementary Material**

**

**

**Figure S1.** The target stimuli and cartoon pictures used in the change detection task. All the target stimuli are the same size, and all the pictures are also cropped to the same size.





**Figure S2.** The Pearson correlation analysis between topological change (tc) minus non-topological change (ntc) and abrupt onset (onset) minus ntc across different eye movement metrics. The anaylsis is performed on the combined sample of children with ASD and TD children. VS = visual search time; SRT = saccadic reaction time; FFDT = first fixation dwell time; AR = saccadic accuracy rate.





**Figure S3.** The Pearson correlation analysis between topological change (tc) minus non-topological change (ntc) and abrupt onset (onset) minus ntc across different eye movement metrics. The analysis is performed on the sample of ASD children. VS = visual search time; SRT = saccadic reaction time; FFDT = first fixation dwell time; AR = saccadic accuracy rate.
